# Supplementary material for: Melatonin improves the efficiency of super-ovulation and timed artificial insemination in sheep
Source: PeerJ. 2019 Apr 25;7:e6750. doi: 10.7717/peerj.6750 (PMC6487178; doi:10.7717/peerj.6750)
Supplement: Table S2 [file peerj-07-6750-s002.xlsx]

## Sheet: Pronuclear embryo procuction
sheep number	MT concentration	Corpus luteum		Flush embryo		normal embryos	Number of recipients	Number of pregnancy	Lamb number
		L	R	L	R
BK1320	5 mg	7	9	9	8	17	7	2	2
BK1270	5 mg	5	5	4	7	11	5	2	2
BKH002	5 mg	4	3	4	3	7	3	2	2
BK1314	5 mg	1	2	1	2	3	1	0	0
BK1256	5 mg	3	5	2	6	8	3	1	2
1322	5 mg	2	7	1	6	7	3	1	1
1406	5 mg	1	1	1	0	1	1	0	0
1504	5 mg	4	3	3	4	7	2	1	2		Luteal mean	Total number of blunt embryo	Available embryos
1312	5 mg	11	15	13	14	27	11	5	6		8.76923	#REF!	8.84615
1124	5 mg	2	1	2	1	3	1	1	2
1138	5 mg	4	4	5	4	9	3	1	1
1416	5 mg	3	6	3	6	9	3	2	2
1308	5 mg	4	2	4	2	6	2	2	2
		51	63	52	63	115	45	20	24
BK2018	0 mg	3	6	5	3	8	3	1	1
BK2016	0 mg	4	3	1	3	4	2	0	0
BK2010	0 mg	11	4	13	2	15	7	2	2
DSMB3009	0 mg	5	7	7	9	16	6	1	1
BK1326	0 mg	4	2	0	0	0	0	0	0
BK1212	0 mg	2	9	2	5	7	3	0	0
1802	0 mg	3	4	7	1	8	3	1	1
1700	0 mg	9	3	7	4	11	4	2	3
TK1028	0 mg	1	2	1	1	2	1	0	0
1118	0 mg	0	3	0	0	0	0	0	0
1806	0 mg	0	2	0	4	4	1	0	0		Luteal mean	Total number of blunt embryo	Available embryos
1602	0 mg	5	5	5	4	9	4	1	1		8.44444	#REF!	8.33333
1812	0 mg	3	3	4	4	8	3	0	0
1610	0 mg	0	2	0	6	6	2	1	1
1606	0 mg	4	8	9	5	14	5	1	1
1808	0 mg	8	8	10	9	19	7	2	2
1804	0 mg	5	3	6	4	10	4	1	1
1708	0 mg	6	5	6	3	9	3	1	1
		73	79	83	67	150	58	14	15

## Sheet: Blastcyste production
Dornor Group	the sheep	MT concentration	Corpus luteum		Flush embryo		Total number	normal embryos
			L	R	L	R
	WS1096	5 mg	4	8	4	8	12	12
	BS494	5 mg	8	9	5	6	11	11
	BS208	5 mg	6	7	6	7	13	13
	BS564	5 mg	10	10	4	7	11	11
	BS0054	5 mg	1	1	2	2	4	4
	BS0060	5 mg	6	4	8	5	13	13
	BS0058	5 mg	5	8	3	7	10	10
	BS0062	5 mg	3	8	0	1	1	1
	BS0024	5 mg	2	4	2	1	3	3
	BS0002	5 mg	9	6	10	6	16	14		Luteal mean	Total number of blunt embryo	Available embryos
	BS0012	5 mg	4	9	1	3	4	2		10.3333	7.8	7.4
	H0006	5 mg	4	2	1	2	3	2
	BS0010	5 mg	5	4	5	4	9	8
	BS0008	5 mg	0	4	0	2	2	2
	BS0028	5 mg	0	4	0	5	5	5
			67	88	51	66	117	111
DORNoR CONTROL GROUP	BS1068	0 mg	2	1	2	0	2	2
	BS568	0 mg	6	3	3	3	6	6
	BS374	0 mg	5	7	4	3	7	7
	BSb052	0 mg	7	7	3	7	10	10
	BS814	0 mg	4	0	1	0	1	1
	WS834	0 mg	2	4	0	0	0	0
	WS544	0 mg	3	7	1	5	6	5
	WD0002	0 mg	8	6	2	2	4	4		Luteal mean	Total number of blunt embryo	Available embryos
	BS0022	0 mg	3	2	1	2	3	3		8.07692	4.07692	3.92308
	BS0030	0 mg	6	4	6	0	6	6
	BS0044	0 mg	5	4	3	1	4	4
	WD0008	0 mg	0	4	0	2	2	2
	BS0064	0 mg	3	2	2	0	2	1
			54	51	28	25	53	51

## Sheet: preganency and lamb
Field test recipient transplantation and pregnancy test and birth record
serial number	MT injection dose	Donor ram	Donor ewe	Recipient ewe	Transplantation of time	Corpus luteum number		Number of follicles		Transplantation of lateral	Implanted embryo	pregnancies	Lambing number	remark
1	5 mg	BS005	BS0014	DP0046	09:49:00	0	3			R	1B+1HB	pregnancy	1
2	5 mg	BS005	BS0014	XH1052	09:49:00	1	1			L	1B+1HB	pregnancy	1
3	5 mg	BS005	BS0014	ZJ0160	09:50:00	2	3			R	1B+1HB	pregnancy	1
4	5 mg	BS005	BS0014	ZJ0646	09:52:00	1	2			L	1B+1HB	pregnancy	1
5	5 mg	BS005	BS0004	XH1198	09:52:00	0	1			R	1B+1HB	nonpregnant	0
6	5 mg	BS005	BS0004	XH0788	09:55:00	3	1			L	1B+1HB	pregnancy	1
7	5 mg	BS005	BS0004	XH0888	09:55:00	0	1			R	1B+1HB	nonpregnant	0
8	5 mg	BS2365	BS0042	ZJ0730	09:57:00	0	2			R	1M+1HB	pregnancy	1
9	5 mg	BS2365	BS0042	ZJ0710	09:59:00	1	3			R	1M+1B	pregnancy	2
10	5 mg	BS2365	BS0002	ZJ0334	10:01:00	0	4			R	2M(B class)	nonpregnant	0
11	5 mg	BS2365	BS0002	XH0488	10:05:00	0	3			R	2M	pregnancy	1
12	5 mg	BS2365	BS0002	ZJ0566	10:05:00	1	0			L	2M	pregnancy	1
13	5 mg	BS2365	BS0002	XH1204	10:10:00	0	1		1	R	1M	pregnancy	1
14	5 mg	BS2365	BS0002	XH0988	10:09:00	1	0			L	2M	pregnancy	1
15	5 mg	BS2365	BS0002	XH1042	10:14:00	0	1		1	R	1M	nonpregnant	0
16	5 mg	BS2365	BS0038	XH0520	10:15:00	0	1			R	2M	nonpregnant	0
17	5 mg	BS2365	BS0038	XH0868	10:16:00	1	2			R	2M	pregnancy	1
18	5 mg	BS2365	BS0038	XH1160	10:18:00	1	1			L	2M	pregnancy	1
19	5 mg	BS005	BS0022	XH0534	10:19:00	4	1			L	2M	nonpregnant	0
20	5 mg	BS2365	BS0040	XH0932	10:20:00	1	0			L	2B	pregnancy	1
21	5 mg	BS2365	BS0040	XH0710	10:21:00	1	1			R	2B	pregnancy	1
22	5 mg	BS2365	BS0040	ZH0310	10:24:00	0	2			R	2M	pregnancy	1
23	5 mg	BS2365	BS0040	XH1026	10:23:00	1	0			L	1B	pregnancy	1
24	5 mg	BS2365	BS0040	ZH0702	10:25:00	0	1			R	2M	nonpregnant	0
25	5 mg	BS2365	BS0040	XH0940	10:27:00	2	1			L	2M	pregnancy	1
serial number	MT injection dose	Donor ram	Donor ewe	Recipient ewe	Transplantation of time	Corpus luteum number		Number of follicles		Transplantation of lateral	Implanted embryo	pregnancies	Lambing number	remark
1		BS005	BS0014	XH0942	10:41:00	0	1	1		R	2B	pregnancy	1
2		BS005	BS0014	XH1048	10:45:00	1	0			L	2B	pregnancy	2
3		BS005	BS0014	ZJ0036	10:48:00	1	1			R	1B	nonpregnant	0
4		BS2365	BS0110	XH1106	12:03:00	0	1			R	1B+1HB	pregnancy	2
5		BS2365	BS0110	XH1070	12:03:00	1	1			R	1M(B class)+1B	nonpregnant	0
6		BS2365	BS0110	XH1012	12:04:00	1	1			L	1M(B class)+1B	pregnancy	1
7		BS2365	BS0064	XH1044	12:07:00	0	1			R	1M	nonpregnant	0
8		BS2365	BS0064	XH1108	12:09:00	2	2			L	1M+1M（B class）	pregnancy	1
9		BS2365	BS0110	XH0954	12:06:00	1	1			R	1M(B class)+1B	pregnancy	1
10		BS2365	BS0064	XH0814	12:10:00	1	0		1	L	2M	nonpregnant	0
11		BS2365	BS0064	ZJ0196	12:13:00	2	1			L	1M+1HB	pregnancy	1
12		BS2365	BS0064	ZJ0210	12:12:00	1	1			R	1M+1M（B class）	nonpregnant	0
13		WD009	WD0156	ZJ0346	12:14:00	2	3			R	1M+1HB	pregnancy	1
14		BS2365	BS0064	XH0066	12:18:00	0	1			R	1B	nonpregnant	0
15		WD009	WD0156	XH0614	12:16:00	1	1			R	1M+1B	pregnancy	1
16		WD009	WD0126	XH1074	12:21:00	1	0			L	2B	nonpregnant	0
17		BS2365	BS0064	ZJ0502	12:22:00	1	1			R	2M	pregnancy	1
18		BS2365	BS0064	XH0412	12:23:00	0	1			R	2M	pregnancy	1
19		BS2365	BS0110	XH0500	12:26:00	0	2	1		R	2M	nonpregnant	0
56		BS2365	BS0110	ZJ0062	12:27:00	0	1			R	2M	pregnancy	1
57		BS2365	BS0110	XH0878	12:28:00	0	3			R	2M	nonpregnant	0
58		BS2365	BS0110	ZJ0244	12:28:00	3	1			L	2M	nonpregnant	0
